# Supplementary material for: Structural and thermodynamic investigations of Zr(BH4)4 and Hf(BH4)4 between 280 K and their decomposition temperatures
Source: Royal Society of Chemistry journal article supplement (doi:10.1039/d3nj05601e), 2024-01-01
Supplement: d3nj05601e1.pdf [file d3nj05601e1.pdf]

**Electronic Supplementary Information:  
Structural and thermodynamic investigations of  $Zr(BH_4)_4$   
and  $Hf(BH_4)_4$  between 280 K and their decomposition  
temperatures**

***Konrad Burkmann, Franziska Habermann, Erik Schumann, Jakob Kraus, Bianca Störr,  
Horst Schmidt, Erica Brendler, Jürgen Seidel, Klaus Bohmhammel, Jens Kortus, and  
Florian Mertens***

**Table of contents**

|        |                                                                                                                  |
|--------|------------------------------------------------------------------------------------------------------------------|
| Page 2 | 1. $^1H$ , $^{11}B$ and $^{91}Zr$ NMR spectra of $Zr(BH_4)_4$ and $Hf(BH_4)_4$                                   |
| Page 4 | 2. Crystal structures of $Hf(BH_4)_4$ and $Zr(BH_4)_4$                                                           |
| Page 5 | 3. SEM images of the decomposition products of the DSC measurements                                              |
| Page 6 | 4. SEM images of the decomposition products after the TG-DSC measurements                                        |
| Page 7 | 5. $C_p$ measurement of $Hf(BH_4)_4$                                                                             |
| Page 7 | 6. Experimental heat capacity values of $Zr(BH_4)_4$ and $Hf(BH_4)_4$                                            |
| Page 8 | 7. Comparison between the optimised values for $Hf(BH_4)_4$ from this work and the ones from the literature      |
| Page 8 | 8. Thermodynamic equilibrium calculations regarding the decomposition behaviour of $Zr(BH_4)_4$ and $Hf(BH_4)_4$ |
| Page 9 | 9. Literature                                                                                                    |

## 1. $^1\text{H}$ , $^{11}\text{B}$ and $^{91}\text{Zr}$ NMR spectra of $\text{Zr}(\text{BH}_4)_4$ and $\text{Hf}(\text{BH}_4)_4$

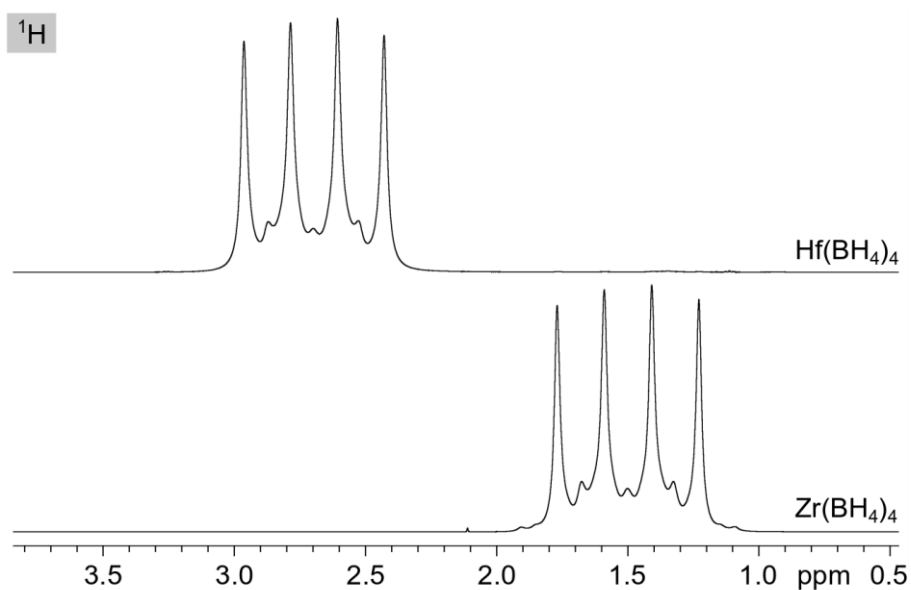

Fig. S1: **top:**  $^1\text{H}$  spectrum of  $\text{Hf}(\text{BH}_4)_4$ ; 28.63 mg in 0.5 mL  $\text{C}_6\text{D}_6$ ;  $\delta = 2.70$  ppm;  $^1J_{\text{H-11B}} = 89.3$  Hz ( $M = 4$ );  $^1J_{\text{H-10B}} = 28.5$  Hz ( $M = 7$ ); **bottom:**  $^1\text{H}$  spectrum of  $\text{Zr}(\text{BH}_4)_4$ ; 27.68 mg in 0.5 mL  $\text{C}_6\text{D}_6$ ;  $\delta = 1.50$  ppm;  $^1J_{\text{H-11B}} = 90.4$  Hz ( $M = 4$ );  $^1J_{\text{H-10B}} = 29.1$  Hz ( $M = 7$ ); signals are given relative to  $\text{SiMe}_4$ .

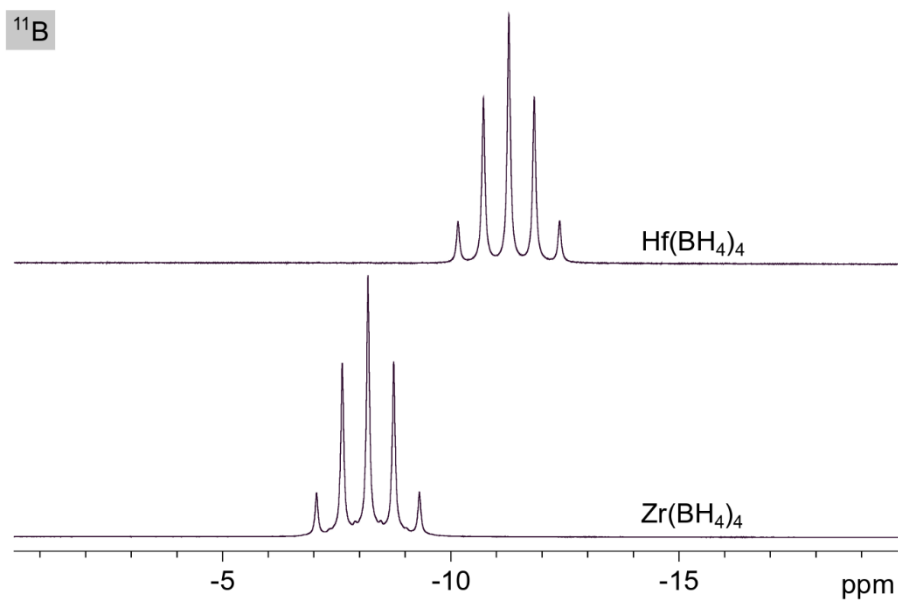

Fig. S2: **top:**  $^{11}\text{B}$  spectrum of  $\text{Hf}(\text{BH}_4)_4$ ; 28.63 mg in  $\text{C}_6\text{D}_6$ ;  $\delta = -11.27$  ppm;  $^1J_{\text{11B-1H}} = 89.3$  Hz ( $M = 5$ ); **bottom:**  $^{11}\text{B}$  spectrum of  $\text{Zr}(\text{BH}_4)_4$ ; 27.68 mg in  $\text{C}_6\text{D}_6$ ;  $\delta = -8.19$  ppm;  $^1J_{\text{11B-1H}} = 90.4$  Hz ( $M = 5$ ); signals are given relative to 15 Vol-% Bortrifluoridetherat  $\text{BF}_3 \cdot \text{Et}_2\text{O}$  in  $\text{CDCl}_3$ .

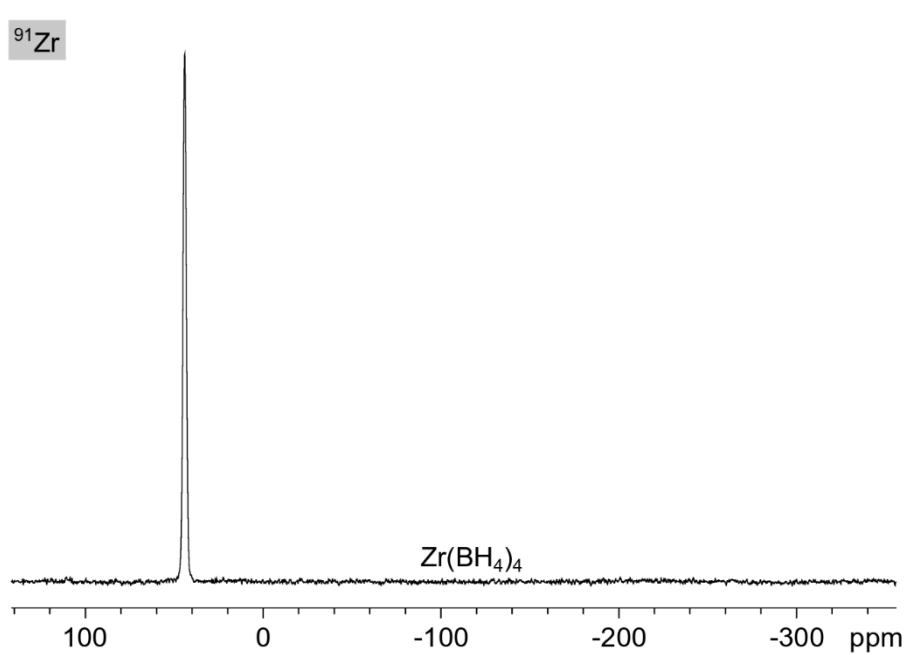

Fig. S3:  $^{91}\text{Zr}$  spectrum  $\text{Zr}(\text{BH}_4)_4$ ; saturated in  $\text{C}_6\text{D}_6:\text{C}_6\text{H}_6$  (1:4);  $\delta = 44.1$  ppm; relative to  $\text{Cp}_2\text{ZrBr}_2$  (0.2 M) in  $\text{THF-d}_8:\text{THF}$  (1:4) = 0 ppm.

## 2. Crystal structures of $\text{Hf}(\text{BH}_4)_4$ and $\text{Zr}(\text{BH}_4)_4$

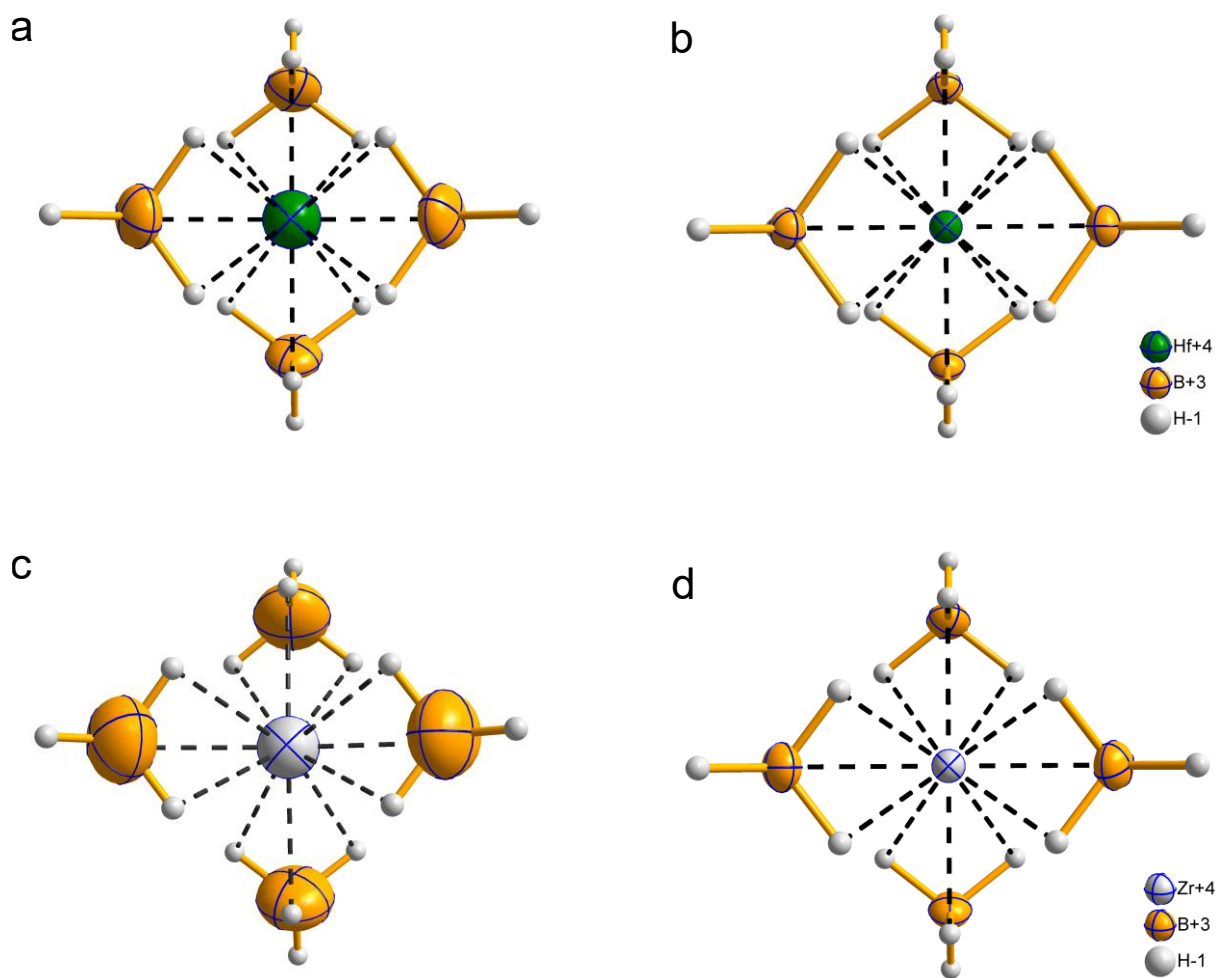

Fig. S4: Crystal structures of  $\text{Hf}(\text{BH}_4)_4$  (top) and  $\text{Zr}(\text{BH}_4)_4$  (bottom) measured in this study (a (288 K), c (273 K)) in comparison with already published ones (b (110 K) [1], d (100 K) [2]). The dotted lines show the M-H contacts.

### 3. SEM images of the decomposition products of the DSC measurements

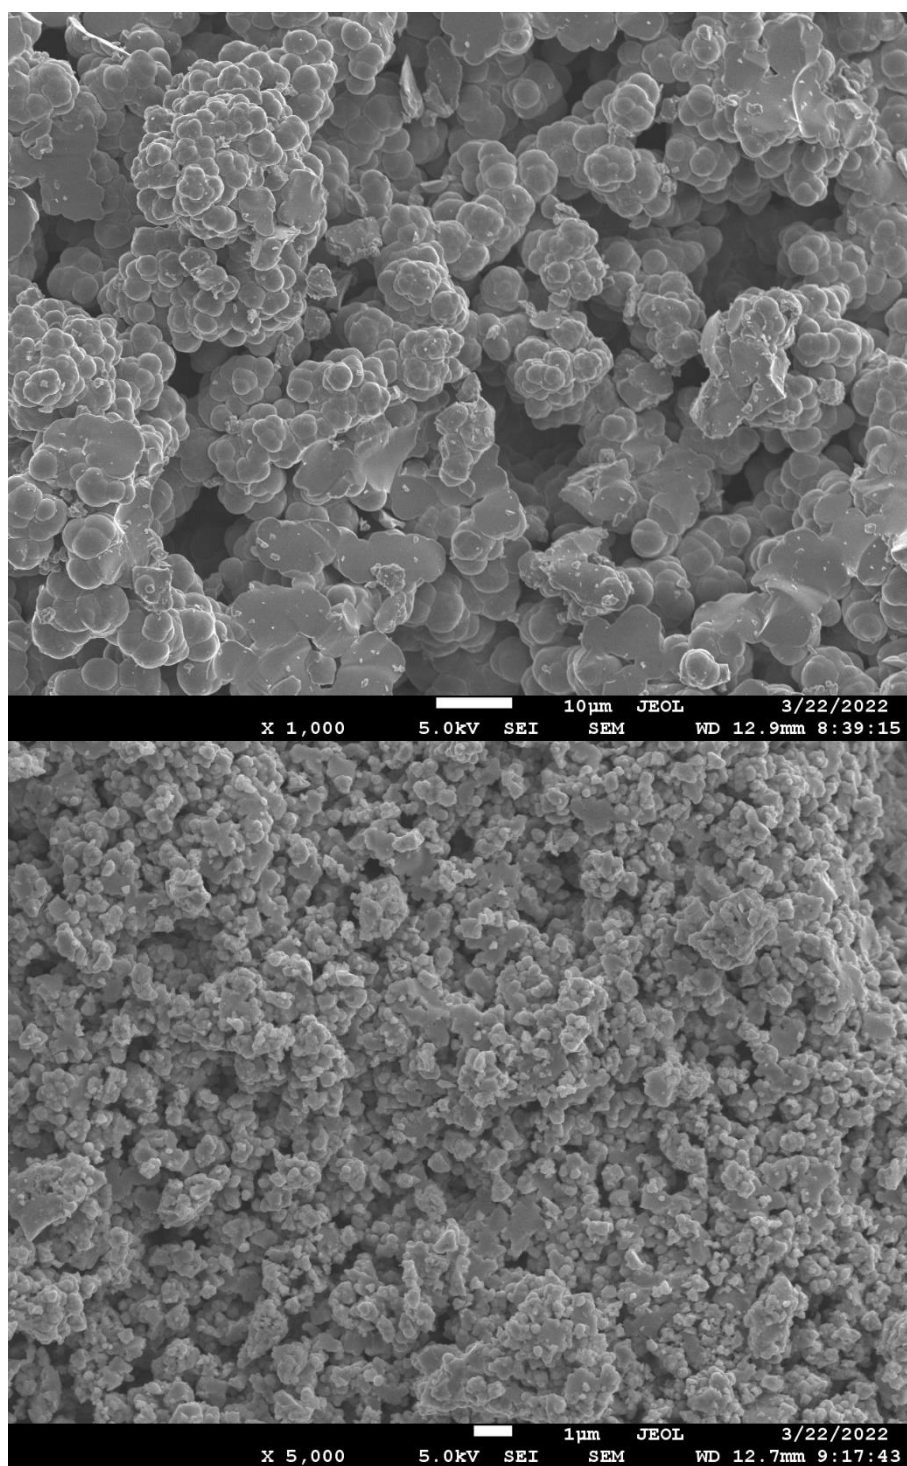

Fig. S5: SEM images of the Zr (top) and Hf (bottom) containing decomposition products after the DSC measurements. The scale is given in the images.

4. SEM images of the decomposition products after the TG-DSC measurements

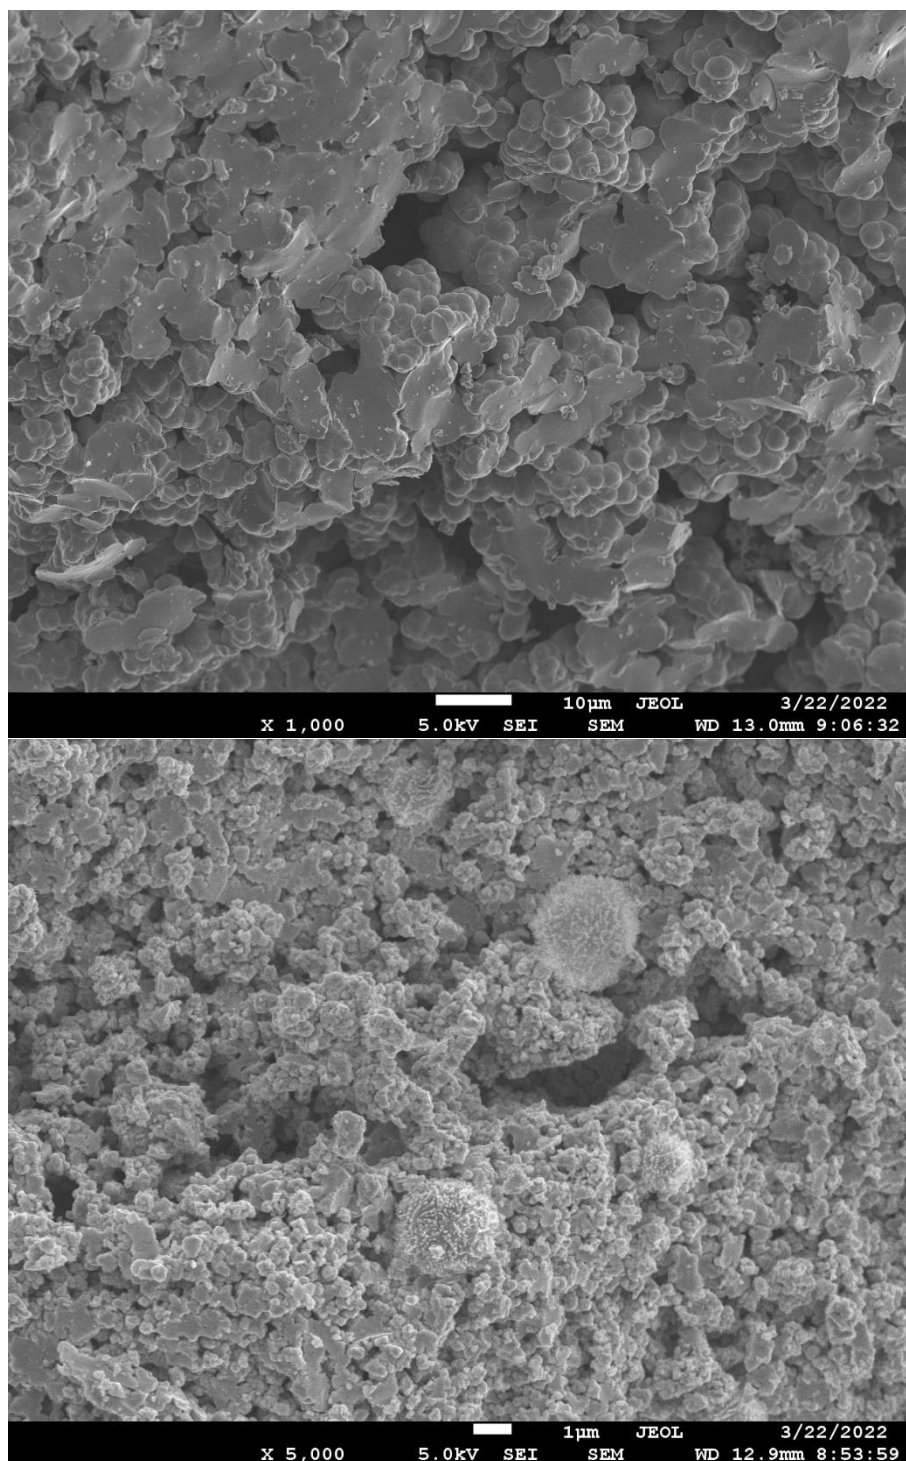

Fig. S6: SEM images of the Zr (top) and Hf (bottom) containing decomposition products after the TG-DSC measurements. The scale is given in the images.

## 5. $C_P$ measurement of $\text{Hf}(\text{BH}_4)_4$

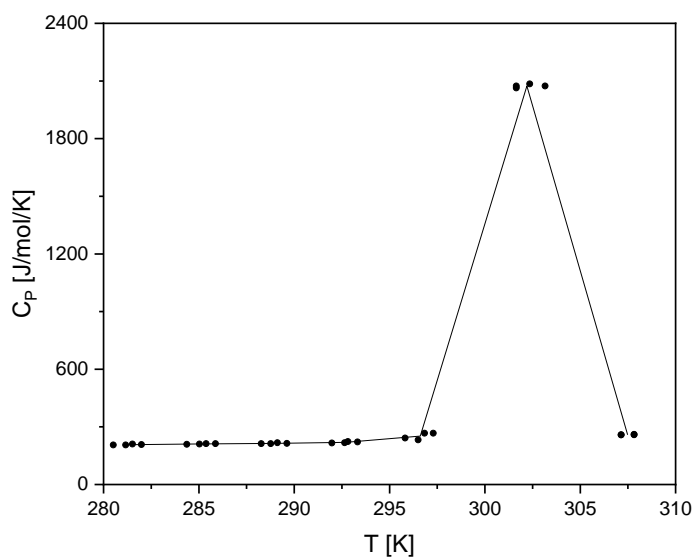

Fig. S7: Graph of the measured  $C_P$  values of  $\text{Hf}(\text{BH}_4)_4$  from 280 K to 310 K (black dots; black line is drawn to guide the readers eyes).

## 6. Experimental heat capacity values of $\text{Zr}(\text{BH}_4)_4$ and $\text{Hf}(\text{BH}_4)_4$

Tab. S1: Mean values of the molar heat capacities of  $\text{Zr}(\text{BH}_4)_4$  and  $\text{Hf}(\text{BH}_4)_4$  measured at the given temperatures between 281 K and 308 K.

| phase            | $\text{Zr}(\text{BH}_4)_4$ |                                             | $\text{Hf}(\text{BH}_4)_4$ |                                             |
|------------------|----------------------------|---------------------------------------------|----------------------------|---------------------------------------------|
|                  | T [K]                      | $C_P$ [ $\text{J mol}^{-1} \text{K}^{-1}$ ] | T [K]                      | $C_P$ [ $\text{J mol}^{-1} \text{K}^{-1}$ ] |
| solid            | 281.79                     | 205.85                                      | 281.30                     | 207.50                                      |
|                  | 285.60                     | 214.70                                      | 285.16                     | 211.37                                      |
|                  | 289.38                     | 224.02                                      | 288.94                     | 214.08                                      |
|                  |                            |                                             | 292.69                     | 219.70                                      |
| phase transition | 293.42                     | 293.77                                      |                            |                                             |
|                  | 297.22                     | 577.64                                      | 296.61                     | 251.90                                      |
|                  | 301.64                     | 3319.00                                     | 302.20                     | 2074.25                                     |
| liquid           | 304.14                     | 250.66                                      |                            |                                             |
|                  | 307.87                     | 252.91                                      | 307.49                     | 259.10                                      |

## 7. Comparison between the optimised values for $\text{Hf}(\text{BH}_4)_4$ from this work and the ones from the literature

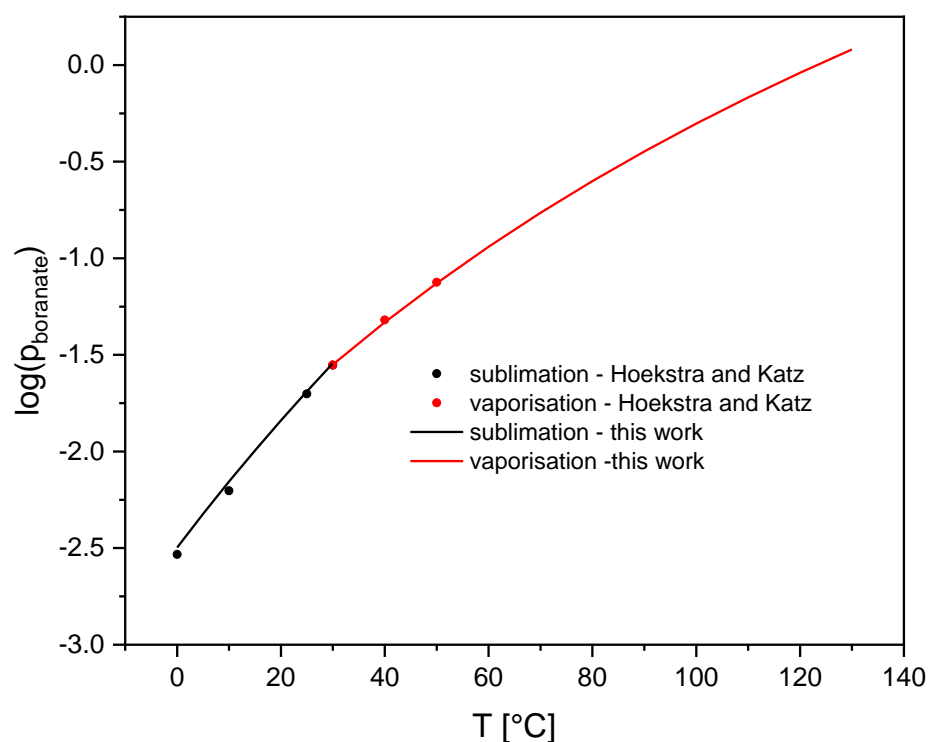

Fig. S8: Comparison between the measured vapour pressure values of Hoekstra and Katz [3] (dots) and our calculated ones (lines) for  $\text{Hf}(\text{BH}_4)_4$  (sublimation: black; vaporisation: red).

## 8. Thermodynamic equilibrium calculations regarding the decomposition behaviour of $\text{Zr}(\text{BH}_4)_4$ and $\text{Hf}(\text{BH}_4)_4$

The Gibbs enthalpies of decomposition  $\Delta_{dec}G$  in the presented graphs were calculated using our determined values from Table 6 in the main part of the manuscript for  $\text{Zr}(\text{BH}_4)_4$  and  $\text{Hf}(\text{BH}_4)_4$ . The data for the other compounds involved were taken from the HSC [4] or the FactSage database [5] and are displayed in Tab. S2. The heat capacities were calculated using a Maier-Kelley type polynomial function [6]:

$$C_P(T) = A + B \cdot T \cdot 10^{-3} + C \cdot T^2 \cdot 10^5 + D \cdot T^3 \cdot 10^{-6}$$

Tab. S2: Summary of all used literature thermodynamic data.

|                            | T range [K] | $\Delta_f H(298.15 \text{ K})$<br>[kJ/mol] | S(298.15 K)<br>[J mol <sup>-1</sup> K <sup>-1</sup> ] | $C_P$ [J mol <sup>-1</sup> K <sup>-1</sup> ] |         |         |          | source |
|----------------------------|-------------|--------------------------------------------|-------------------------------------------------------|----------------------------------------------|---------|---------|----------|--------|
|                            |             |                                            |                                                       | A                                            | B       | C       | D        |        |
| $\text{H}_2$ (g)           | 298.15-5000 | 0.000                                      | 130.679                                               | 25.855                                       | 4.837   | 1.584   | -0.372   | [4]    |
| B (s)                      | 298.15-1500 | 0.000                                      | 5.900                                                 | 16.033                                       | 12.895  | -7.570  | -3.234   | [4]    |
| $\text{B}_2\text{H}_6$ (g) | 298.15-900  | 41.003                                     | 232.086                                               | 2.235                                        | 213.291 | -1.075  | -79.525  | [4]    |
| $\text{ZrH}_2$ (s)         | 298.15-960  | -169.452                                   | 35.020                                                | 37.522                                       | 33.916  | -16.359 | 0.000    | [4]    |
| $\text{HfH}_2$ (s)         | 298.15-2506 | -125.520                                   | 38.425                                                | 64.280                                       | 8.8292  | 0.452   | 0.003    | [5]    |
| $\text{ZrB}_2$ (s)         | 100-600     | -322.586                                   | 35.941                                                | -3.916                                       | 233.340 | -0.545  | -196.082 | [4]    |
| $\text{ZrB}_2$ (s)         | 600-3323    |                                            |                                                       | 65.836                                       | 7.284   | -15.990 | 0.579    | [4]    |
| $\text{HfB}_2$ (s)         | 298.15-3000 | -328.862                                   | 42.677                                                | 73.346                                       | 7.824   | -23.012 | 0.000    | [4]    |



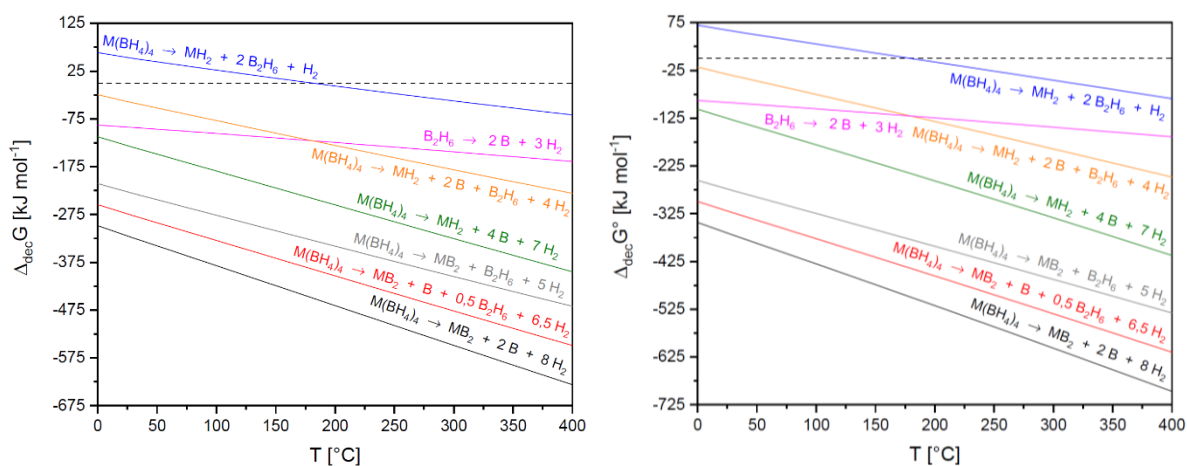

Fig. S9: Comparison between the different possible decomposition reactions of  $Zr(BH_4)_4$  (left) and  $Hf(BH_4)_4$  (right) calculated with our determined data for both boranates and the literature data [4,5] for the other compounds.

Fig. S9 displays the results of several theoretically possible decomposition reactions. As can be seen, the thermodynamically most favorable decomposition is the one that generates the metal diborides, two equivalents of boron and eight equivalents of hydrogen without any release of diborane. The formation of metal dihydrides as intermediates may appear because of the fact that direct decomposition into the metal diborides is kinetically hindered at these low decomposition temperatures.

## 9. Literature

- [1] R. W. Broach, I. S. Chuang, T. J. Marks and J. M. Williams, *Inorg. Chem.*, 1983, **22**, 1081–1084.
- [2] L. H. Rude, M. Corno, P. Ugliengo, M. Baricco, Y.-S. Lee, Y. W. Cho, F. Besenbacher, J. Overgaard and T. R. Jensen, *J. Phys. Chem. C*, 2012, **116**, 20239–20245.
- [3] H. R. Hoekstra, J. J. Katz, *J. Am. Chem. Soc.*, 1949, **71**, 2488–2492.
- [4] A. Roine, *HSC Chemistry*, 2002, <https://www.hsc-chemistry.com/>.
- [5] C.W. Bale, E. Bélisle, P. Chartrand, S. A. Decterov, G. Eriksson, A. E. Gheribi, K. Hack, I. H. Jung, Y. B. Kang, J. Melançon, A. D. Pelton, S. Petersen, C. Robelin, J. Sangster, P. Spencer and M. A. van Ende, *Calphad*, 2016, **54**, 35–53.
- [6] C. G. Maier, K. K. Kelley, *J. Am. Chem. Soc.*, 1932, **54**, 3243–3246.
